# Supplementary material for: Laying hen mortality in different indoor housing systems: a meta-analysis of data from commercial farms in 16 countries
Source: PubMed Central journal article supplement (PMC7862694; doi:10.1038/s41598-021-81868-3), 2021-02-04
Supplement: 41598_2021_81868_MOESM1_ESM.pdf [file 41598_2021_81868_MOESM1_ESM.pdf]

# Supplementary Material

## Laying hen mortality in different housing systems: a meta-analysis of data from commercial farms in 16 countries

Authors: Cynthia Schuck-Paim; Elsa Negro-Calduch, Wladimir J. Alonso

**Table S1. References excluded at the full-text screening stage.**

| First Author | Year | Title                                                                                                                                                             | Exclusion Reason                                                                                                                                            |
|--------------|------|-------------------------------------------------------------------------------------------------------------------------------------------------------------------|-------------------------------------------------------------------------------------------------------------------------------------------------------------|
| AgraCEAS     | 2004 | Study on the socio-economic implications of the various systems to keep laying hens                                                                               | No information on flock ages, or data enabling calculation of cumulative mortality at specific ages; some estimates do not seem to be empirically collected |
| Ahammed      | 2014 | Comparison of aviary, barn and conventional cage raising of chickens on laying performance and egg quality                                                        | Non-commercial                                                                                                                                              |
| Amin         | 2013 | Behaviour of laying curve in Babcock-380 brown commercial                                                                                                         | Lacks: Production system description.                                                                                                                       |
| Anderson     | 2007 | Effects of alternative molting programs and population on layer performance: Results of the thirty-fifth North Carolina layer performance and management tests    | Non-commercial                                                                                                                                              |
| Appleby      | 2002 | Development of furnished cages for laying hens                                                                                                                    | Non-commercial                                                                                                                                              |
| Aral         | 2017 | Economic comparison of unenriched and alternative cage systems used in laying hen husbandry - recent experience under Turkish commercial conditions               | Non-commercial                                                                                                                                              |
| Berg         | 2001 | Health and welfare in organic poultry production.                                                                                                                 | Organic only                                                                                                                                                |
| Bestman      | 2004 | Health in organic laying hens – facts and fairy tales. Proc. of the 2nd SAFO Workshop, Witzenhausen, Germany, pp. 145–152.                                        | Organic only                                                                                                                                                |
| Blatchford   | 2016 | The utilization of the Welfare Quality assessment for determining laying hen condition across three housing systems                                               | Duplicate data with Fulton 2019                                                                                                                             |
| Blokhuys     | 2007 | The LayWel project: welfare implications of changes in production systems for laying hens                                                                         | Mixed data on commercial and small experimental trials. No information on hen age                                                                           |
| Cabezas      | 2011 | Análisis de la interacción genotipo x ambiente entre sistemas de alojamiento y razas de gallinas ponedoras para indicadores de bienestar y calidad de huevo       | Non-commercial                                                                                                                                              |
| Cabrelon     | 2015 | Bem-estar animal: densidades de ocupação em gaiolas convencionais de produção de ovos e seus reflexos nos índices produtivos                                      | Non-commercial                                                                                                                                              |
| Cande        | 2016 | Avaliação do desempenho produtivo de poedeiras comerciais da linhagem Hy-Line Silver Brown na empresa Galovos Lda. no distrito de Boane, Maputo                   | Non-commercial                                                                                                                                              |
| Comin        | 2019 | Revealing the structure of the associations between housing system, facilities, management and welfare of commercial laying hens using Additive Bayesian Networks | Mortality data (by housing) is aggregated for conventional and organic flocks                                                                               |
| Croxall      | 2007 | The comparative welfare of laying hens in a wide range of egg production systems as assessed by criteria in Swedish animal welfare standards                      | Lacks: Mortality Information                                                                                                                                |

|               |      |                                                                                                                                                                               |                                               |
|---------------|------|-------------------------------------------------------------------------------------------------------------------------------------------------------------------------------|-----------------------------------------------|
| DEFRA         | 2009 | The influence of rearing environment on propensity for injurious pecking in laying hens.                                                                                      | Non-commercial                                |
| Demli         | 2018 | Comparing the performance and egg quality of two strains of laying hens housed in furnished cages                                                                             | Non-commercial                                |
| Demli         | 2016 | Comparative performance and egg quality of laying hens in enriched cages and free-range systems                                                                               | Non-commercial                                |
| Dickmen       | 2016 | Egg production and welfare of laying hens kept in different housing systems                                                                                                   | Non-commercial                                |
| Drake         | 2010 | Influence of rearing and lay risk factors on propensity for feather damage in laying hens                                                                                     | Lacks: Mortality Information                  |
| EFSA          | 2005 | Opinion of the Scientific Panel on Animal Health and Welfare on a request from the Commission related to the welfare aspects of various systems of keeping laying hens        | Review. Data from before 2000                 |
| EFSA          | 2015 | Scientific Opinion on welfare aspects of the use of perches for laying hens                                                                                                   | Does not apply to research question           |
| Eladl         | 2018 | Prevalence of mites and their impact on laying hen ( <i>Gallus gallus domesticus</i> ) farm facilities in Egypt, with an analysis of deltamethrin residues in eggs and tissue | Non-commercial                                |
| Elson         | 2015 | Poultry welfare in intensive and extensive production systems                                                                                                                 | Review                                        |
| Englmaierova  | 2014 | Effects of laying hens housing system on laying performance, egg quality characteristics, and egg microbial contamination                                                     | Lacks: Mortality Information                  |
| Estevez       | 2014 | ISAE2014: proceedings of the 48th congress of the International Society for Applied Ethology, Vitoria-Gasteiz, Spain.                                                         | Lacks: Mortality Information                  |
| Fossum        | 2009 | Causes of mortality in laying hens in different housing systems in 2001 to 2004                                                                                               | Convenience sample (not cumulative mortality) |
| Freire        | 2013 | The welfare of laying hens in conventional cages and alternative systems: first steps towards a quantitative comparison                                                       | Meta-Analysis of other authors' data          |
| Golden        | 2012 | A comparative examination of rearing parameters and layer production performance for brown egg-type pullets grown for either free-range or cage production                    | Non-commercial                                |
| Gómez         | 2010 | Evaluación del bienestar animal y comparación de los parámetros productivos en gallinas ponedoras de la línea Hy-Line Brown en tres modelos de producción ...                 | Non-commercial                                |
| Guesdon       | 2004 | Humeral quality and adrenal responsiveness in laying hens reared in standard and furnished cages                                                                              | Non-commercial                                |
| Guesdon       | 2004 | Laying performance and egg quality in hens kept in standard or furnished cages                                                                                                | Non-commercial                                |
| Guinebretiere | 2013 | Plumage condition, body weight, mortality, and zootechnical performances: The effects of linings and litter provision in furnished cages for laying hens                      | Non-commercial                                |
| Hagan         | 2013 | The egg production performance of three layer strains kept under intensive system in the hot and humid tropics                                                                | Non-commercial                                |
| Hane          | 2000 | Survey of laying hen husbandry in Switzerland                                                                                                                                 | Data from before 2000                         |
| Heerkens      | 2013 | Do keel bone deformations affect egg-production in end-of-lay laying hens housed in aviaries?                                                                                 | Duplicate data                                |
| Heerkens      | 2014 | Effect of aviary housing characteristics on laying hen welfare and performance                                                                                                | Duplicate data                                |
| Hegelund      | 2006 | Welfare and productivity of laying hens in commercial organic egg production systems in Denmark                                                                               | Free-range/organic only                       |
| Henry         | 2002 | Organic Poultry - Eggs. Maritime Certified                                                                                                                                    | Lacks: Mortality information                  |

|                                        |      |                                                                                                                                                                                |                                                                                                                                                |
|----------------------------------------|------|--------------------------------------------------------------------------------------------------------------------------------------------------------------------------------|------------------------------------------------------------------------------------------------------------------------------------------------|
| Hetland                                | 2004 | Effect of including whole oats into pellets on performance and plumage condition in laying hens housed in conventional and furnished cages                                     | Non-commercial                                                                                                                                 |
| Huneau-Salaun                          | 2011 | Endotoxin concentration in poultry houses for laying hens kept in cages or in alternative housing systems                                                                      | Non-commercial                                                                                                                                 |
| Iannaccone                             | 2013 | Productive performance and egg quality of laying hens raised in conventional and furnished cages                                                                               | Mortality seems to be mean monthly mortality, makes it difficult to derive accumulated mortality in the presence of induced molting procedure. |
| Itza-Ortiz                             | 2016 | Productive performance of white Leghorn hens based on the type of housing during hearing: floor versus cage.                                                                   | Restricted period of observation, not possible to calculate age-specific mortality at 60 weeks                                                 |
| Jendral                                | 2008 | Bone Mineral Density and Breaking Strength of White Leghorns Housed in Conventional, Modified, and Commercially Available Colony Battery Cages                                 | Lacks: Mortality Information                                                                                                                   |
| Karcher                                | 2015 | Impact of commercial housing systems and nutrient and energy intake on laying hen performance and egg quality parameters                                                       | Duplicate data with Fulton 2019                                                                                                                |
| Krivankova                             | 2020 | Comparison of selected indices of internal environment and condition of laying hens kept in furnished cages and in aviaries                                                    | Lacks: Mortality Information                                                                                                                   |
| Landman                                | 2015 | The incidence and economic impact of the Escherichia coli peritonitis syndrome in Dutch poultry farming                                                                        | The age for which mortality is reported not clear                                                                                              |
| Leenstra                               | 2012 | Performance of commercial laying hen genotypes on free range and organic farms in Switzerland, France and the Netherlands                                                      | Free-range/organic only                                                                                                                        |
| Leyendecker                            | 2005 | Keeping laying hens in furnished cages and an aviary housing system enhances their bone stability                                                                              | Lacks: Mortality Information                                                                                                                   |
| Louton                                 | 2017 | Evaluation of welfare parameters in laying hens on the basis of a Bavarian survey                                                                                              | Mortality data aggregated for all systems (aviaries, free-range, furnished cages). Aggregated data based on survey.                            |
| Méndez                                 | 2010 | Aplicabilidad de un protocolo de medición de bienestar animal creado por el proyecto Welfare Quality® en gallinas de postura comercial en jaulas                               | Lacks: Mortality Information                                                                                                                   |
| Mielenz                                | 2005 | Mortality of laying hens housed in single and group cages                                                                                                                      | Article in German, mortality reported at 6 months (not end of lay), not clear if conditions are commercial                                     |
| Morrissey                              | 2016 | Can Non-Beak Treated Hens be Kept in Commercial Furnished Cages? Exploring the Effects of Strain and Extra Environmental Enrichment on Behaviour, Feather Cover, and Mortality | Non-commercial                                                                                                                                 |
| Mugnai                                 | 2009 | Effect of rearing system and season on the performance and egg characteristics of Ancona laying hens                                                                           | Non-commercial                                                                                                                                 |
| National Chung-Hsing University Thesis | 2015 | Investigating the welfare of laying hens in the conventional cage and floor production systems by Welfare Quality®                                                             | Chinese, Experimental                                                                                                                          |
| Nicodemus                              | 2012 | Efecto de la densidad de gallinas por jaula y de la estirpe sobre la producción y la calidad del huevo                                                                         | Very small sample, likely non-commercial                                                                                                       |
| Oden                                   | 2002 | Behaviour of laying hens in two types of aviary systems on 25 commercial farms in Sweden                                                                                       | Lacks: Mortality information                                                                                                                   |
| Oliveira                               | 2014 | Performance and quality of egg laying hens raised in furnished cages and controlled environment                                                                                | Lacks: Mortality Information                                                                                                                   |
| Olivera                                | 2019 | Effects of litter floor access and inclusion of experienced hens in aviary housing on floor eggs, litter condition, air quality, and hen welfare                               | Non-commercial                                                                                                                                 |
| Peralta                                | 2016 | Productive performance and behavior of laying hens in three housing systems under tropical conditions                                                                          | Open systems exposed to weather conditions                                                                                                     |

|           |      |                                                                                                                                                                          |                                                                                                                                                      |
|-----------|------|--------------------------------------------------------------------------------------------------------------------------------------------------------------------------|------------------------------------------------------------------------------------------------------------------------------------------------------|
| Peralta   | 2016 | Desempeño productivo y conductas etológicas de gallinas ponedoras en tres tipos de manejo en condiciones de trópico cálido                                               | Non-commercial                                                                                                                                       |
| Pereira   | 2010 | Estimating mortality in laying hens as the environmental temperature increases                                                                                           | Lacks: Mortality Information                                                                                                                         |
| Philippe  | 2020 | Comparison of egg production, quality and composition in three production systems for laying hens                                                                        | Non-commercial                                                                                                                                       |
| Pohle     | 2009 | Furnished cage system and hen well-being: Comparative effects of furnished cages and battery cages on behavioral exhibitions in White Leghorn chickens                   | Lacks: Mortality Information                                                                                                                         |
| Popescu   | 2012 | Battery Change Improves the Welfare of Laying Hens, <i>Animal science and Biotechnologies</i> 45, 250 (2012).                                                            | Not clear if the cage system is exposed to weather. Not clear if induced molting was practiced (as indicated by high mortality in cages at 78 weeks) |
| Rakonjac  | 2014 | Laying hen rearing systems: a review of major production results and egg quality traits                                                                                  | Review                                                                                                                                               |
| Regmi     | 2018 | Effects of different litter substrates and induced molt on production performance and welfare quality parameters of white Leghorn hens housed in multi-tiered aviary ... | Non-commercial                                                                                                                                       |
| Rivera    | 2016 | Evaluación de pico de postura y persistencia de la producción en gallinas ponedoras de las líneas Hy-line W-36 y Hy-Line CV-24de 78 semanas de edad                      | Lacks: Production system description. Non-commercial setting                                                                                         |
| Rodrigues | 2011 | Desempenho e qualidade de ovos de galinhas poedeiras de uma granja em região de clima tropical                                                                           | Mortality reporting inconsistent (text and chart in Annex A). Conventional cage in open systems (exposed to weather)                                 |
| Roll      | 2005 | Bienestar animal y productividad en gallinas ponedoras comerciales alojadas en jaulas enriquecidas                                                                       | Non-commercial                                                                                                                                       |
| Roll      | 2008 | Aspectos etológicos y productivos de gallinas ponedoras alojadas en jaulas convencionales o enriquecidas de fabricación española                                         | Duplicate data with Roll 2008                                                                                                                        |
| Sherwin   | 2013 | Prevalence of nematode infection and faecal egg counts in free-range laying hens: relations to housing and husbandry                                                     | Lacks: Mortality Information                                                                                                                         |
| Shimmura  | 2007 | Behavior, physiology, performance and physical condition of layers in conventional and large furnished cages in a hot environment                                        | Non-commercial                                                                                                                                       |
| Shimmura  | 2010 | Multi-factorial investigation of various housing systems for laying hens                                                                                                 | Non-commercial                                                                                                                                       |
| Shittu    | 2014 | Predictors of death and production performance of layer chickens in opened and sealed pens in a tropical savanna environment                                             | Production in conventional cages, open system (mortality estimates excludes culling of aggressive, sick and poorly producing birds)                  |
| Silva     | 2013 | Performance of laying hens and economic viability of different cimatization systems                                                                                      | Only mean daily mortalities (aggregated over the entire period) are provided. Two of the systems seem to be exposed to weather conditions.           |
| Singh     | 2009 | Production performance and egg quality of four strains of laying hens kept in conventional cages and floor pens                                                          | Non-commercial                                                                                                                                       |
| Sirovnik  | 2018 | Feeding from perches in an aviary system reduces aggression and mortality in laying hens                                                                                 | Non-commercial                                                                                                                                       |
| Sirovnik  | 2018 | Feeder space affects access to the feeder, aggression, and feed conversion in laying hens in an aviary system. <i>Appl. Anim. Behav. Sci.</i> 198:75–82.                 | Non-commercial                                                                                                                                       |
| Sosnówka  | 2010 | Effect of different housing systems on productivity and welfare of laying hens                                                                                           | Review                                                                                                                                               |
| Sparks    | 2008 | Socio-economic drivers for UK organic pullet rearers and the implications for poultry health                                                                             | Organic only                                                                                                                                         |

|                |      |                                                                                                                                                                                                                                                                               |                                                                                                                                                                                          |
|----------------|------|-------------------------------------------------------------------------------------------------------------------------------------------------------------------------------------------------------------------------------------------------------------------------------|------------------------------------------------------------------------------------------------------------------------------------------------------------------------------------------|
| Sterling       | 2003 | Relationships Among Strain, Performance, and Environmental Temperature in Commercial Laying Hens                                                                                                                                                                              | Data from before 2000                                                                                                                                                                    |
| Steward        | 2006 | Assessment of Laying Hens Maintained in Different Housing Systems                                                                                                                                                                                                             | Non-commercial                                                                                                                                                                           |
| Stojčić        | 2012 | Effect of genotype and housing system on egg production, egg quality and welfare of laying hens                                                                                                                                                                               | Non-commercial                                                                                                                                                                           |
| Stokholm       | 2010 | Causes of Mortality in Commercial Organic Layers in Denmark                                                                                                                                                                                                                   | Organic only                                                                                                                                                                             |
| Stratmann      | 2015 | Soft perches in an aviary system reduce incidence of keel bone damage in laying hens                                                                                                                                                                                          | Cumulative mortality data (by age) not clear. Not clear how long is a laying period (mortality provided by laying period). Active culling of birds with lesions and locomotion problems. |
| Tactacan       | 2009 | Performance and welfare of laying hens in conventional and enriched cages                                                                                                                                                                                                     | Non-commercial                                                                                                                                                                           |
| Tauson         | 2005 | Mortality, production and use of facilities in furnished small group cages for layers in commercial egg production in Sweden 1998–2003. Proceedings of the 7:th European Symposium on Poultry Welfare, Lublin, Poland, June 2005. AnimalScience Papers and Reports.23: 95-102 | Data from before 2000                                                                                                                                                                    |
| Tavares        | 2018 | Mortality, production and quality of eggs of different rearing systems                                                                                                                                                                                                        | Mortality only over 30 days                                                                                                                                                              |
| Van            | 2009 | A review of key health-related welfare issues in organic poultry production                                                                                                                                                                                                   | Organic only                                                                                                                                                                             |
| van der Meulen | 2007 | Questionnaire survey of disease prevalence and veterinary treatments in organic layer husbandry in the Netherlands                                                                                                                                                            | Organic only                                                                                                                                                                             |
| Voslářová      | 2006 | Comparison between laying hen performance in the cage system and the deep litter system on a diet free from animal protein                                                                                                                                                    | Non-commercial                                                                                                                                                                           |
| Wang           | 2015 | Investigating the welfare of laying hens in the conventional cage and floor production systems by Welfare Quality (CHINA)                                                                                                                                                     | Non-commercial                                                                                                                                                                           |
| Weber          | 2003 | Investigations of laying hen health in enriched cages as compared to conventional cages and a floor pen system                                                                                                                                                                | Non-commercial                                                                                                                                                                           |
| Weeks          | 2007 | Laywel: welfare implications of changes in production systems for laying hens. Deliverable 7.1 Overall strengths and weaknesses of each defined housing system for laying hens, and detailing the overall welfare impact of each housing system                               | Duplicate data with Blokhuis 2007                                                                                                                                                        |
| Weimer         | 2019 | Laying hen production and welfare in enriched colony cages at different stocking densities                                                                                                                                                                                    | Non-commercial                                                                                                                                                                           |
| Weitzenbürger  | 2005 | Effect of furnished small group housing systems and furnished cages on mortality and causes of death in two layer strains                                                                                                                                                     | Non-commercial                                                                                                                                                                           |
| Weżyk          | 2006 | Quality traits of eggs from Hyline White and Hyline Brown hens kept in cages and on litter.                                                                                                                                                                                   | Non-commercial                                                                                                                                                                           |
| Widowski       | 2017 | Effect of space allowance and cage size on laying hens housed in furnished cages, Part I: Performance and well-being                                                                                                                                                          | Non-commercial                                                                                                                                                                           |
| Yakubu         | 2007 | Effects of Genotype and Housing System on the Laying Performance of Chickens in Different Seasons in the Semi-Humid Tropics                                                                                                                                                   | Non-commercial                                                                                                                                                                           |
| Zuleima        | 2019 | Caracterización Productiva del Período de Postura en Gallinas Lohman                                                                                                                                                                                                          | Small sample (6000), no information on hen age                                                                                                                                           |

**Table S2. Description of Sources included in the meta-analyses.**

Data sources with information on cumulative laying hen mortality in commercially managed systems (2000-2020). CC: conventional cages; FC: furnished cages; ST: single-tier aviary; MT: multi-tier aviary; AV: aviary (type unspecified). All data and links to sources are available at <https://osf.io/r5f6c>.

| Code    | Source                                      | Bibliographic details                                                                                                                                                                                                                                | Housing | Flocks | Country         |
|---------|---------------------------------------------|------------------------------------------------------------------------------------------------------------------------------------------------------------------------------------------------------------------------------------------------------|---------|--------|-----------------|
| AGR_14  | Agrovision (2014)                           | Laying hen performance in different production systems; why do they differ and how to close the gap? European Poultry Science 78 (2014)                                                                                                              | AV      | 589    | NLD             |
|         |                                             |                                                                                                                                                                                                                                                      | FC      | 95     |                 |
| CAM_15  | Campe et al (2015)                          | Determinants of economic success in egg production in Germany – here: laying hens kept in aviaries or small-group housing systems. Applied Agricultural and Forestry Research 65, 227–238 (2015).                                                    | MT      | 47     | DEU             |
|         |                                             |                                                                                                                                                                                                                                                      | FC      | 18     |                 |
| ELS_06  | i. Elson & Croxall (2006); ii. Elson (2015) | i. European study on the comparative welfare of laying hens in cage and non-cage systems. Archiv Fur Geflugelkunde 70, 194–198 (2006); ii. Poultry welfare in intensive and extensive production systems. Worlds. Poult. Sci. J. 71, 449–460 (2015). | CC      | 4      | GBR;DEU;<br>NLD |
|         |                                             |                                                                                                                                                                                                                                                      | FC      | 3      |                 |
|         |                                             |                                                                                                                                                                                                                                                      | MT      | 4      |                 |
|         |                                             |                                                                                                                                                                                                                                                      | ST      | 6      |                 |
| FER_09  | Ferrante et al (2009)                       | Effects of two different rearing systems (organic and barn) on production performance, animal welfare traits and egg quality characteristics in laying hens. Ital. J. Anim. Sci. 8, 165–174 (2009).                                                  | ST      | 1      | ITA             |
| FUL_19* | Fulton (2019)                               | Health of commercial egg laying chickens in different housing systems. Avian Dis. 63: 420–426 (2019)                                                                                                                                                 | CC      | 2      | USA             |
|         |                                             |                                                                                                                                                                                                                                                      | MT      | 2      |                 |
|         |                                             |                                                                                                                                                                                                                                                      | FC      | 2      |                 |
| GER_12  | Gerzilov et al (2012)                       | Effect of poultry housing systems on egg production. Bulgarian Journal of Agricultural Science 18, 953–957 (2012).                                                                                                                                   | CC      | 5      | BGR             |
|         |                                             |                                                                                                                                                                                                                                                      | FC      | 2      |                 |
|         |                                             |                                                                                                                                                                                                                                                      | ST      | 4      |                 |
| HEE_15  | Heerkens et al (2015)                       | Specific characteristics of the aviary housing system affect plumage condition, mortality and production in laying hens. Poult. Sci. 94, 2008–2017 (2015).                                                                                           | MT      | 47     | BEL             |
| HOR_10  | Horne et al (2010)                          | The poultry and pig sector in Argentina. Husbandry practice and animal welfare. (2010).                                                                                                                                                              | CC      | 210    | ARG             |
| WOR_13  | Rubinoff (2013)                             | Rubinoff, I. Key global health issues in cage-free and organic laying hens (Hy-Line World Data on Mortality). in 5th International Veterinary Poultry Congress (Hy-Line International, 2016).                                                        | CC      | 249    | WOR             |
|         |                                             |                                                                                                                                                                                                                                                      | AV      | 122    |                 |
| FRA_16  | ITAVI (2016)                                | Performances techniques et coûts de production en volailles de chair, poulette et poules pondeuses. Resultat 2016                                                                                                                                    | CC      | 1020   | FRA             |
|         |                                             |                                                                                                                                                                                                                                                      | ST      | 51     |                 |
|         |                                             |                                                                                                                                                                                                                                                      | FC      | 1020   |                 |
| LON_16  | Long et al (2016)                           | Effect of light-emitting diode vs. fluorescent lighting on laying hens in aviary hen houses: Part 1 - Operational characteristics of lights and production traits of hens. Poult. Sci. 95, 1–11 (2016).                                              | MT      | 4      | USA             |
| URY_16  | MGAP Uruguay (2016)                         | Encuesta Postura Comercial 2014 - Oficina de Estadísticas Agropecuarias (DIEA)                                                                                                                                                                       | CC      | 48     | URY             |
| NOR_18  | Nortura (2018)                              | Nortura Eggkontroll Program, Data from Producers, Norway (2017-2019)                                                                                                                                                                                 | MT      | 199    | NOR             |
|         |                                             |                                                                                                                                                                                                                                                      | FC      | 44     |                 |
| PET_15  | Petrik et al (2015)                         | On-farm comparison of keel fracture prevalence and other welfare indicators in conventional cage and floor-housed                                                                                                                                    | CC      | 9      | CAN             |

|        |                                                     |                                                                                                                                                                                                                                                                    |                      |                      |                                  |
|--------|-----------------------------------------------------|--------------------------------------------------------------------------------------------------------------------------------------------------------------------------------------------------------------------------------------------------------------------|----------------------|----------------------|----------------------------------|
|        |                                                     | laying hens in Ontario, Canada. <i>Poult. Sci.</i> 94, 579–585 (2015).                                                                                                                                                                                             | ST                   | 8                    |                                  |
| RIB_17 | Riber & Hinrichsen (2017)                           | Welfare Consequences of Omitting Beak Trimming in Barn Layers. <i>Front Vet Sci</i> 4, 222 (2017).                                                                                                                                                                 | AV<br>AV             | 10<br>10             | DEN                              |
| ROD_08 | Rodenburg et al (2008)                              | Welfare assessment of laying hens in furnished cages and non-cage systems: assimilating expert opinion. <i>Anim. Welf.</i> 17, 355–361 (2008)                                                                                                                      | FC<br>ST<br>MT       | 6<br>4<br>3          | BEL; DEU<br>NLD; BEL<br>NLD; BEL |
| SHI_19 | Shini et al (2019)                                  | Fatty liver haemorrhagic syndrome occurrence in laying hens: impact of production system. <i>Avian Pathol.</i> 48, 25–34 (2019).                                                                                                                                   | CC                   | 3                    | AUS                              |
| STA_16 | Stadig et al (2016)                                 | Survey of egg farmers regarding the ban on conventional cages in the EU and their opinion of alternative layer housing systems in Flanders, Belgium. <i>Poult. Sci.</i> 95, 715–725 (2016).                                                                        | FC<br>ST<br>MT       | 19<br>44<br>53       | BEL                              |
| TAH_14 | Tahamtani et al (2014)                              | Does rearing laying hens in aviaries adversely affect long-term welfare following transfer to furnished cages? <i>PLoS ONE</i> 9: e107357 (2014).                                                                                                                  | FC                   | 2                    | NOR                              |
| USA_13 | USDA (2013)                                         | Layers 2013 Part I: Reference of Health and Management Practices on Table-Egg Farms in the United States (2014).                                                                                                                                                   | CC<br>FC<br>AV       | 1074<br>53<br>171    | USA                              |
| VST_18 | van Staaveren et al (2018)                          | A description of laying hen husbandry and management practices in Canada. <i>Animals</i> 8, (2018).                                                                                                                                                                | FC<br>ST<br>MT       | 26<br>17<br>22       | CAN                              |
| WEL_12 | Weeks et al (2016): data from AssureWel(R) (2012)   | Implications for welfare, productivity and sustainability of the variation in reported levels of mortality for laying hen flocks kept in different housing systems. Dataset: <a href="https://doi.org/10.5061/dryad.60q44">https://doi.org/10.5061/dryad.60q44</a> | ST                   | 9                    | GBR                              |
| FSA_09 | Weeks et al (2016): data from FSA (2009)            | "                                                                                                                                                                                                                                                                  | CC<br>FC<br>ST       | 427<br>17<br>62      | GBR                              |
| NIC_06 | Weeks et al (2016): data from Nicol et al (2006)    | "                                                                                                                                                                                                                                                                  | ST                   | 36                   | GBR                              |
| RIC_12 | Weeks et al (2016): data from Richards et al (2012) | "                                                                                                                                                                                                                                                                  | FC                   | 11                   | GBR                              |
| SHE_10 | Weeks et al (2016): data from Sherwin et al (2010)  | "                                                                                                                                                                                                                                                                  | CC<br>FC<br>ST       | 5<br>6<br>7          | GBR                              |
| UFA_06 | Weeks et al (2016): data from UFAW (2006)           | "                                                                                                                                                                                                                                                                  | FC<br>ST             | 6<br>10              | GBR                              |
| WQP_12 | Weeks et al (2016): data from Welfare Quality(R)    | "                                                                                                                                                                                                                                                                  | MT<br>CC<br>FC<br>ST | 31<br>10<br>11<br>31 | SWE; NLD                         |

|        |                    |                                                                                                                                                                                                     |    |    |     |
|--------|--------------------|-----------------------------------------------------------------------------------------------------------------------------------------------------------------------------------------------------|----|----|-----|
| ZLO_18 | Zloch et al (2018) | Influence of alternative husbandry systems on postmortem findings and prevalence of important bacteria and parasites in layers monitored from end of rearing until slaughter. Vet.Rec182:350 (2018) | AV | 29 | AUT |
|--------|--------------------|-----------------------------------------------------------------------------------------------------------------------------------------------------------------------------------------------------|----|----|-----|

---

\* FUL\_19: same dataset as Karcher et al 2015.Poultry Science 94: 485-501



**Table S3. Search Strategy for Web of Science (core collection) database**

(Indexes=SCI-EXPANDED, SSCI, A&HCI, CPCI-S, CPCI-SSH, BKCI-S, BKCI-SSH, ESCI  
Timespan=2000-2020; any document type)

| No. | Search Strategy                                                                      | Items found |
|-----|--------------------------------------------------------------------------------------|-------------|
| #1. | TOPIC: ("laying hen" OR layer)                                                       | 1,490,441   |
| #2. | TOPIC: (aviar* OR cage* OR housing OR barn)                                          | 303,269     |
| #3. | TOPIC: (mortality OR death OR performance OR survival<br>OR productivity OR welfare) | 6,099,867   |
| #4. | #1 AND #2 AND #3                                                                     | 2,886       |

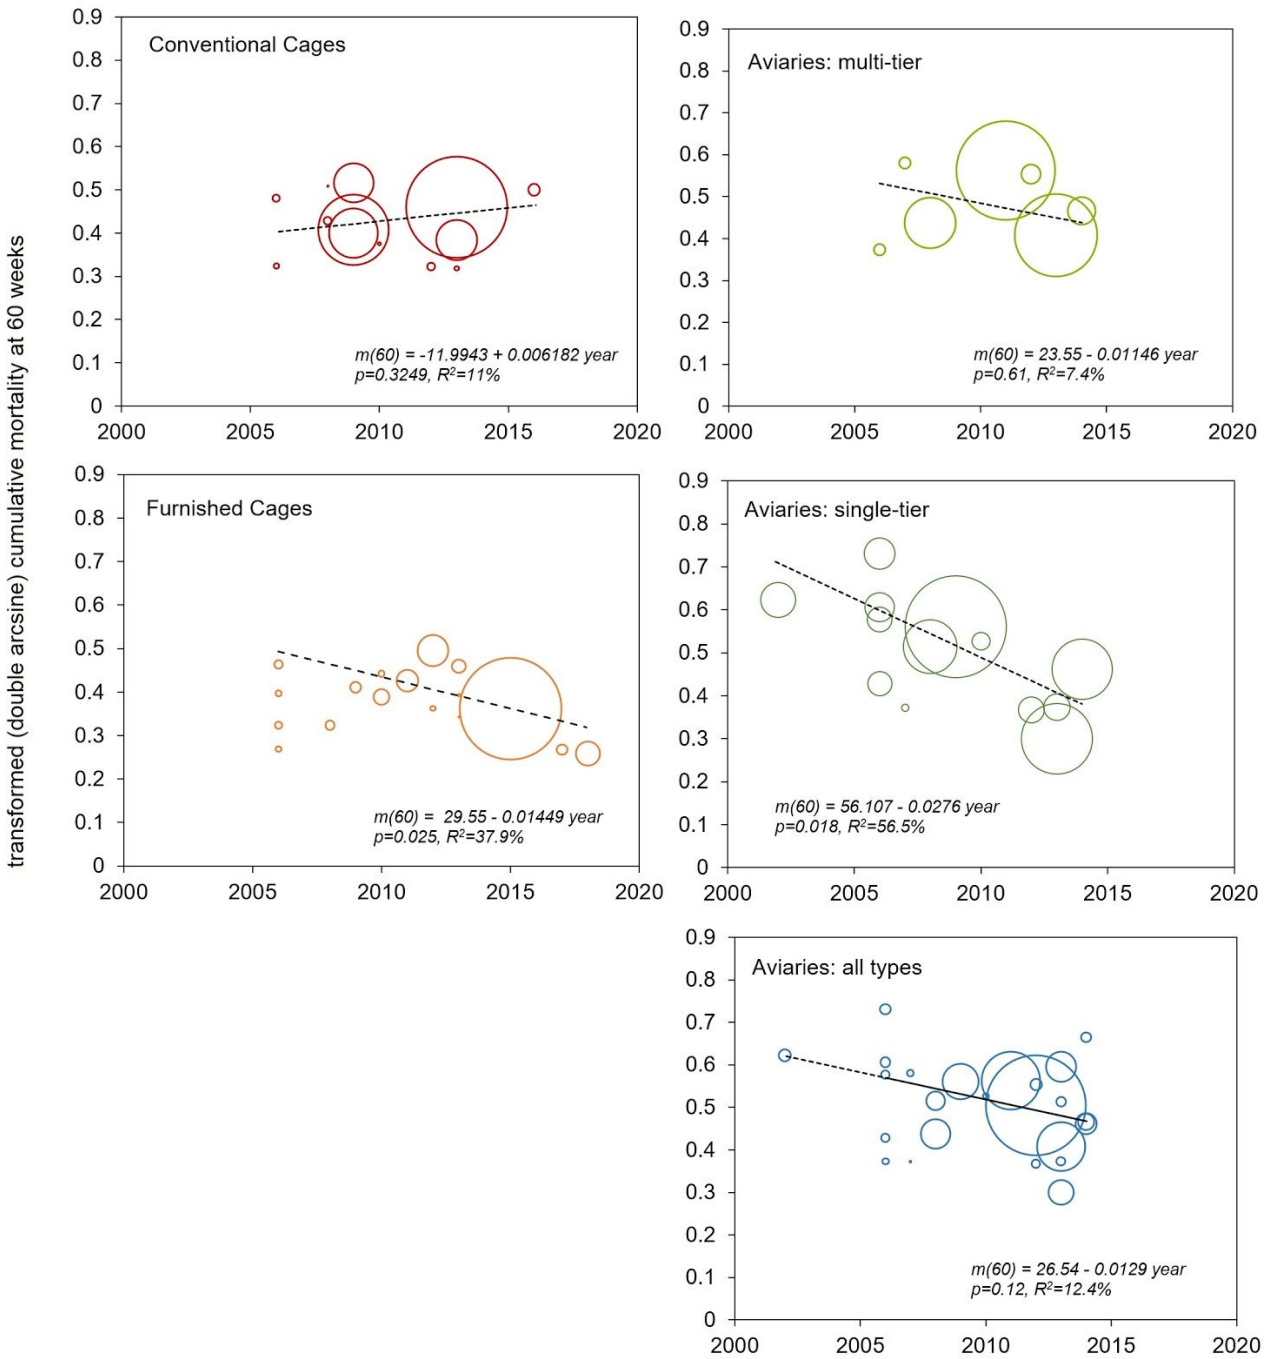

**Figure S1.** Meta-regression of cumulative laying hen mortality ( $m_{60}$ , double arcsine transformed) in different indoor housing systems as a function of mid-year of data collection. Data sources for which we could not confirm that all flocks were kept exclusively indoors (multi-tier: HEE\_15, NOR\_18, VST\_18; single-tier: VST\_18; undefined aviary: USA\_13) were excluded. Regression equations and statistical results are shown in each corresponding graph. Each circle corresponds to one data source, with circle sizes representing the weights from the meta-analysis.
